# Supplementary material
Source: PubMed Central journal article supplement (PMC4227286)
Supplement: NIHMS59989-supplement-Supplementary_tables_1___2___discussion.pdf [file NIHMS59989-supplement-Supplementary_tables_1___2___discussion.pdf]

## Supplementary Discussion

### **(A) Discussion of previous experiments that used somatic mutations of single cells to reconstruct embryological lineages.**

Using somatic mutations to reconstruct the development of mice has previously been explored. In these experiments insertions and deletions in selected short tandem repeats were genotyped using PCR-based methods, typically from whole genome amplified DNA from single cells. In most, but not all, cases this experimental approach has been applied to cells derived from hypermutator mice in which mutational load at short tandem repeats is high.

Collectively, these studies have begun to demonstrate that reconstructing embryology from somatic mutations is feasible. Indeed, an advantage that this approach offers is that the same loci can be measured in different animals from the same species. A major disadvantage, however, is that false positive variants will be introduced into the data at several steps including whole genome amplification, PCR of the short tandem repeats and sequencing of the repeats. The extent of these errors, particularly from single cells, is not clear. Moreover, the potential intrinsic high mutability of short tandem repeats means that the genotypes at these loci cannot be assumed to be constant as cells evolve during embryogenesis. Thus mutations can revert and/or be obliterated by further mutations at the same repeat confusing phylogenetic analysis. Although these errors/issues in the data are usually statistically compensated for in data analysis, ultimately data precision is lost which precludes the exact insights into early embryogenesis that the approach we have taken, based on whole genome sequencing and substitutions, can provide. Of course, a further advantage of this approach is that it is based on unbiased sequencing for all classes of mutation and thus also informs on mutational processes that have been operative during embryogenesis.

### **(B) Discussion of the *in vivo* versus *in vitro* origin of mutations found in organoids.**

We expanded single cells or monoclonal single glands / crypts *in vitro* to use the cellular machinery to amplify DNA. During the culturing period (3-6 weeks) it is likely that mutations have arisen *in vitro* (*in vitro* mutations). These mutations occur independently and privately in individual cells and present as subclonal when sequencing DNA derived from a culture. Therefore, when analysing mutations unique to each of the 25 organoids, we applied stringent filters to exclude subclonal variants and to target heterozygous variants. Heterozygous variants are present in every cell of the culture and therefore represent mutations of the stem cell that the culture was derived from. The stem cell had acquired these mutation *in vivo* (*in vivo* variants). Statistical analysis of the mutant

read frequency using the Dirichlet process confirmed that in every organoid presented, there is only a single clone which is heterozygous (Supplementary Figure 1). Thus, we are likely to have captured *in vivo* mutations in this experiment. This line of reasoning has an important limitation. Should a single cell, whilst in culture, gain a growth advantage over all other cells, it could in principle expand and become the major clone of the culture. With time, all cells in the culture would then be derived from this new dominant clone. Its mutations would comprise both *in vivo* mutations of the original stem cell as well as private mutations that this particular cell had acquired *in vitro*. Both sets of mutations would present as heterozygous.

Although it is conceivable that in our cultures aberrant clones with a growth advantage evolved, it would seem highly unlikely for this to have happened consistently and independently in every of the 25 organoid cultures during the limited culturing period. Further, one would expect that organoids dominated by a novel *in vitro* clone would differ in terms of mutation burden and spectrum. However, within each tissue in both mice the data is remarkably consistent in terms of mutations burden and spectrum. In small bowel we have been able to assess *in vitro* mutational spectrum directly by subcloning single organoid cells after eight weeks in culture. The spectrum of these *in vitro* mutations was markedly different from the spectrum of *in vivo* small bowel mutations (Supplementary Figure 7). Thus, overall the data indicate that the heterozygous mutations unique to each organoid represent *in vivo* mutations.

### **(C) Discussion of differences in mutation rate between embryonic and small bowel stem cells.**

We estimated that small bowel stem cells accumulate  $\sim 1.1$  mutations per cell division, similar to what we observe during embryogenesis ( $\sim 1.5$  mutations / division  $35/23$  cell divisions). Because these rates are very similar, and given the small number of embryonic divisions and mutations we are working with in this study, we cannot say whether there really is a difference between embryonic and adult stem cell mutation rates per cell division based on these calculations. It should also be noted that we cannot exclude additional early divisions due to limitations of sequencing coverage in the tail and thus statistical power. If there are more than 23 cell divisions in the two lineages, that would reduce the embryonic mutation rate from  $\sim 1.5$  even further towards the rate of  $\sim 1.1$  observed in adult small bowel stem cells.

**Supplementary Table 1: Sample characteristics**

| ID      | Alias ID | Age (weeks) | Site            | Sequencing depth | Sensitivity* | Number of unique substitutions | Number of unique substitutions adjusted for sensitivity | C>T substitutions at XpCpG trinucleotides | C>T substitutions at XpCpG trinucleotides, adjusted for sensitivity |
|---------|----------|-------------|-----------------|------------------|--------------|--------------------------------|---------------------------------------------------------|-------------------------------------------|---------------------------------------------------------------------|
| M1_Tail | MD4953b  | 116         | Tail            | 37               | 1            | -                              | -                                                       | -                                         | -                                                                   |
| M1_LB1  | MD4953d  | 116         | Colon           | 5                | 0.28         | 135                            | 482                                                     | 35                                        | 125                                                                 |
| M1_LB2  | MD4953d2 | 116         | Colon           | 5                | 0.31         | 186                            | 600                                                     | 38                                        | 123                                                                 |
| M1_LB3  | MD4953d3 | 116         | Colon           | 5                | 0.32         | 270                            | 844                                                     | 70                                        | 219                                                                 |
| M1_LB4  | MD4953d4 | 116         | Colon           | 5                | 0.31         | 329                            | 1061                                                    | 58                                        | 187                                                                 |
| M1_SB1  | MD4953e  | 116         | Small Intestine | 8                | 0.48         | 452                            | 942                                                     | 63                                        | 131                                                                 |
| M1_SB2  | MD4953e2 | 116         | Small Intestine | 6                | 0.42         | 426                            | 1014                                                    | 92                                        | 219                                                                 |
| M1_SB3  | MD4953e3 | 116         | Small Intestine | 13               | 0.67         | 589                            | 879                                                     | 94                                        | 140                                                                 |
| M1_SB4  | MD4953e4 | 116         | Small Intestine | 5                | 0.36         | 246                            | 683                                                     | 46                                        | 128                                                                 |
| M1_SB5  | MD4953e5 | 116         | Small Intestine | 7                | 0.41         | 417                            | 1017                                                    | 73                                        | 178                                                                 |
| M1_SB6  | MD4953e6 | 116         | Small Intestine | 8                | 0.48         | 571                            | 1190                                                    | 79                                        | 165                                                                 |
| M1_St1  | MD4953f  | 116         | Stomach         | 6                | 0.58         | 229                            | 395                                                     | 25                                        | 43                                                                  |
| M1_St2  | MD4953f2 | 116         | Stomach         | 7                | 0.64         | 166                            | 259                                                     | 23                                        | 36                                                                  |
| M1_St3  | MD4953f3 | 116         | Stomach         | 8                | 0.75         | 189                            | 252                                                     | 38                                        | 51                                                                  |
| M2_Tail | MD4954b  | 98          | Tail            | 35               | 1            | -                              | -                                                       | -                                         | -                                                                   |
| M2_LB1  | MD4954c  | 98          | Colon           | 6                | 0.29         | 254                            | 876                                                     | 54                                        | 186                                                                 |
| M2_LB2  | MD4954c2 | 98          | Colon           | 7                | 0.38         | 278                            | 732                                                     | 55                                        | 145                                                                 |
| M2_LB3  | MD4954c3 | 98          | Colon           | 5                | 0.35         | 173                            | 494                                                     | 38                                        | 109                                                                 |
| M2_SB1  | MD4954d  | 98          | Small Intestine | 10               | 0.6          | 450                            | 750                                                     | 84                                        | 140                                                                 |
| M2_SB2  | MD4954d2 | 98          | Small Intestine | 6                | 0.38         | 326                            | 858                                                     | 52                                        | 137                                                                 |
| M2_St1  | MD4954e  | 98          | Stomach         | 6                | 0.56         | 132                            | 236                                                     | 17                                        | 30                                                                  |
| M2_St2  | MD4954e2 | 98          | Stomach         | 5                | 0.47         | 121                            | 257                                                     | 28                                        | 60                                                                  |
| M2_St3  | MD4954e3 | 98          | Stomach         | 8                | 0.75         | 185                            | 247                                                     | 24                                        | 32                                                                  |
| M2_P1   | MD4954f  | 98          | Prostate        | 5                | 0.44         | 117                            | 266                                                     | 3                                         | 7                                                                   |
| M2_P2   | MD4954f2 | 98          | Prostate        | 6                | 0.58         | 168                            | 290                                                     | 13                                        | 22                                                                  |
| M2_P3   | MD4954f3 | 98          | Prostate        | 6                | 0.53         | 95                             | 179                                                     | 13                                        | 25                                                                  |
| M2_P4   | MD4954f4 | 98          | Prostate        | 6                | 0.5          | 210                            | 420                                                     | 16                                        | 32                                                                  |
